# Supplementary material for: Salvia elegans, Salvia greggii and Salvia officinalis Decoctions: Antioxidant Activities and Inhibition of Carbohydrate and Lipid Metabolic Enzymes
Source: PubMed Central journal article supplement (PMC6321363; doi:10.3390/molecules23123169), 2018-12-01
Supplement: molecules-23-03169-s001.pdf [file molecules-23-03169-s001.pdf]

# *Salvia elegans*, *Salvia greggii* and *Salvia officinalis* Decoctions: Antioxidant Activities and Inhibition of Carbohydrate and Lipid Metabolic Enzymes

Olívia R. Pereira <sup>1</sup>, Marcelo D. Catarino <sup>2</sup>, Andrea F. Afonso <sup>1,2,3</sup>, Artur M. S. Silva <sup>2</sup> and Susana M. Cardoso <sup>2,\*</sup>

<sup>1</sup> Centro de Investigação de Montanha (CIMO), Instituto Politécnico de Bragança, Campus de Santa Apolónia, 5300-253 Bragança, Portugal; oliviapereira@ipb.pt (O.R.P.); andrea@ipb.pt (A.F.A.)

<sup>2</sup> QOPNA & LAQV-REQUIMTE, Department of Chemistry, University of Aveiro, 3810-193 Aveiro, Portugal; mcatarino@ua.pt (M.D.C.); artur.silva@ua.pt (A.M.S.S.)

<sup>3</sup> Public Health Laboratory of Bragança, Local Health Unit, Rua Eng. Adelino Amaro da Costa, 5300-146 Bragança, Portugal

\* Correspondence: susanacardoso@ua.pt; Tel.: +351-234-370-360; Fax: +351-234-370-084

## Supplementary Materials:

Peak 20

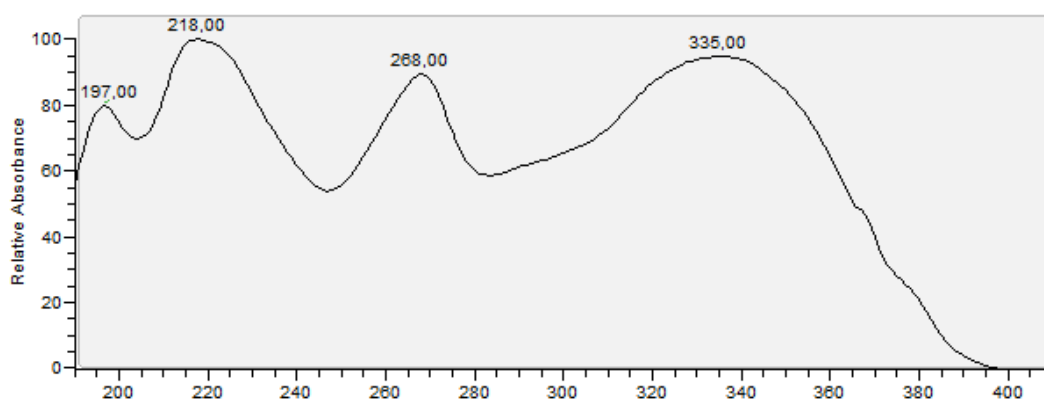

Peak 23

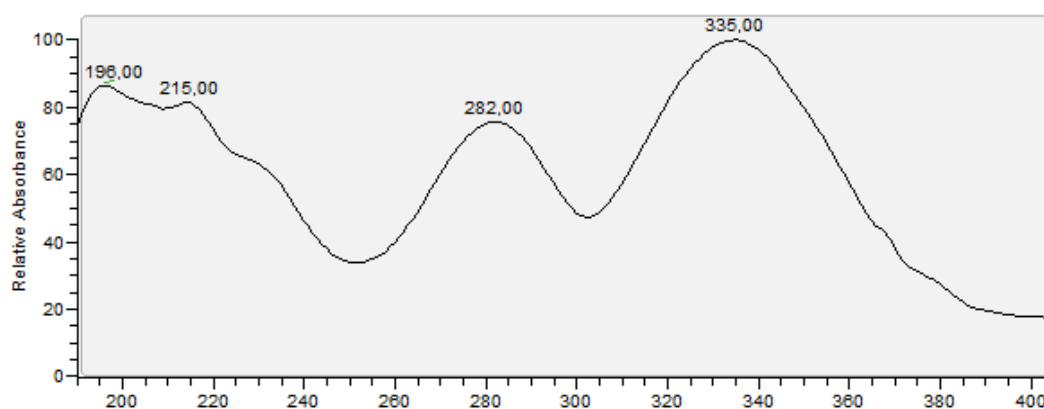

Peak 24

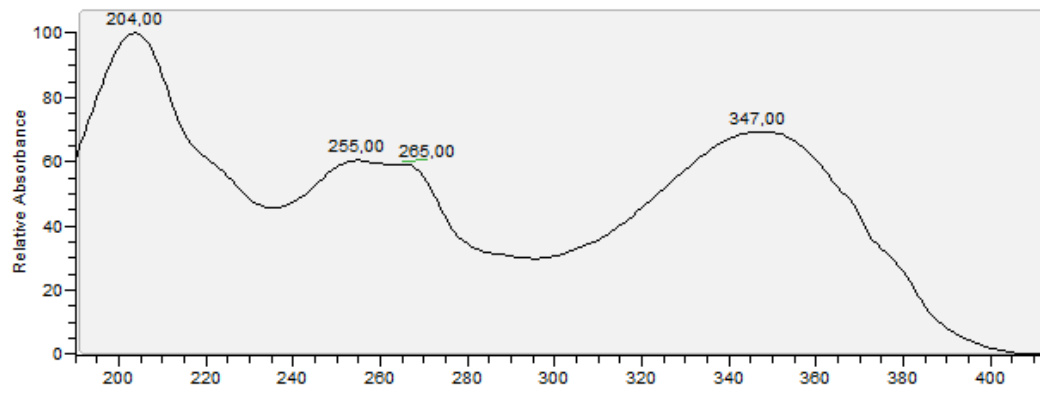

Peak 25

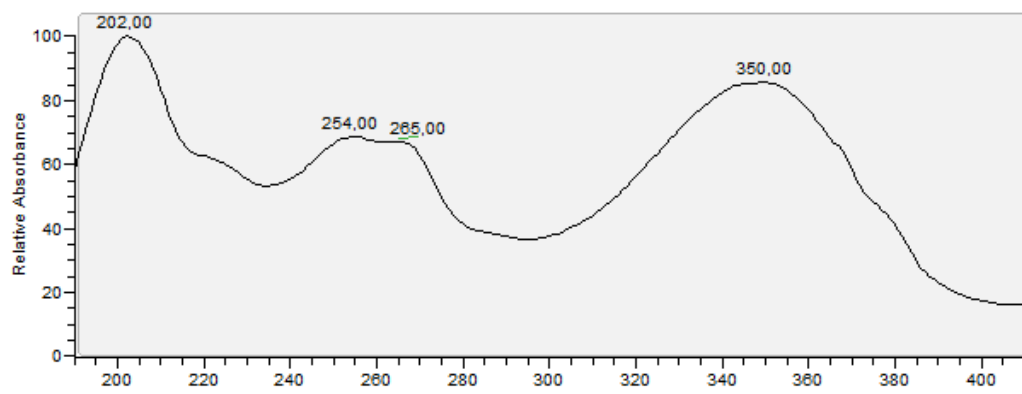

Peak 33

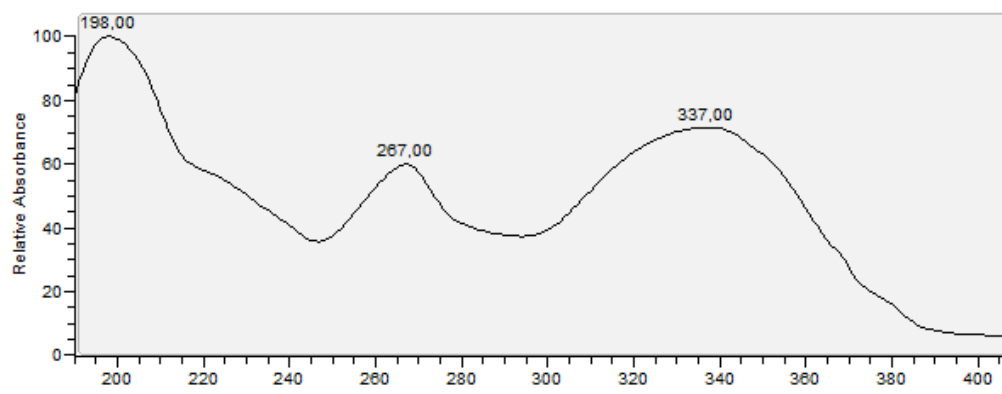

Peak 36

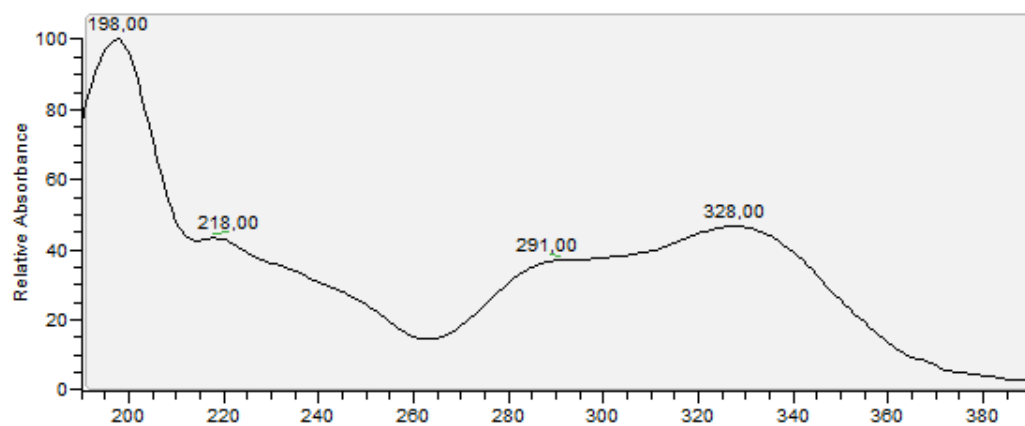

### Peak 39

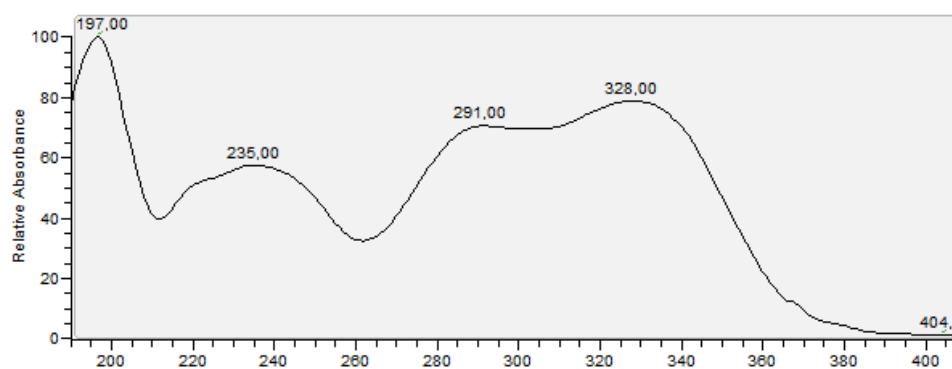

**Figure S1.** UV spectra of the main peaks identified in *S. elegans*, *S. greggii*, and *S. officinalis* decoctions. Numbers correspond to the UHPLC-DAD-ESI-MS<sup>n</sup> peaks described in Table 1.
